# Supplementary material for: Impact of Learning to Read in a Mixed Approach on Neural Tuning to Words in Beginning Readers
Source: Front Psychol. 2020 Jan 23;10:3043. doi: 10.3389/fpsyg.2019.03043 (PMC6989560; doi:10.3389/fpsyg.2019.03043)
Supplement: TABLE S1 — Complete list of target stimuli used in the FPVS-EEG testing (global words, control words and control pseudowords) in French as well as in their English translation. [file Table_1.XLSX]

## Sheet: Stimuli words
Global words_French	Global words_English translation	Control words_French	Control words_English translation	Control pseudowords
amie	friend	bruit	noise	ablet
arbre	tree	ciel	sky	calpe
bébé	baby	côté	side	cétô
chien	dog	dame	lady	clie
école	school	fleur	flower	dimi
fête	party	forêt	forest	édie
jupe	skirt	frère	brother	èpre
lundi	Monday	gare	train station	erfèr
lune	moon	idée	idea	frelu
maman	mum	matin	morning	frêto
mare	pond	midi	noon	gape
moto	motorcycle	neige	snow	igene
pomme	apple	ours	bear	made
porte	door	page	page	manit
pull	sweater	patte	paw	rega
robe	dress	père	father	reuto
robot	robot	place	place	rosu
tigre	tiger	route	road	taix
usine	factory	table	table	tapte
vélo	bike	taxi	taxi	trubi
