# Supplementary material for: Impact of Learning to Read in a Mixed Approach on Neural Tuning to Words in Beginning Readers
Source: Front Psychol. 2020 Jan 23;10:3043. doi: 10.3389/fpsyg.2019.03043 (PMC6989560; doi:10.3389/fpsyg.2019.03043)
Supplement: TABLE S2 — Individual behavioral data of general cognitive functions and reading assessments for the 42 children retained in the study. [file Table_2.XLSX]

## Sheet: Behavioral data_42 subjects
Subjects_EEG_number	Chronological_age_months	Sex_Boy_Girl	Laterality_Right_Left	Reading_levels_1GR_0AR_3PR	Reading_Composite_score_%	Reading_Single_letters_%	Reading_Simple_syllables_%	Reading_Complex_syllables_%	Reading_Complex_glyphs_%	Reading_Contextual_syllables_%	Reading_Regular_words_%	Reading_Irregular_words_%	Reading_Pseudo_words_%	Nonverbal_intelligence_%	Selective_attention_sec	Vocabulary_production_%
S01	80	G	R	1	58.1556	96.1538	100	80	42.4242	53.3333	33.3333	25	35	83.3333	5.28697	82.4561
S02	81	G	R	1	74.0574	92.3077	81.8182	86.6667	66.6667	53.3333	91.6667	50	70	80.5556	6.93229	89.4737
S03	72	G	L	1	40.5886	80.7692	72.7273	80	21.2121	33.3333	8.33333	8.33333	20	91.6667	3.41775	80.7018
S04	77	G	R	1	37.0425	88.4615	72.7273	66.6667	15.1515	26.6667	16.6667	0	10	69.4444	5.40703	89.4737
S05	73	G	R	1	52.0644	100	90.9091	73.3333	27.2727	60	33.3333	16.6667	15	72.2222	7.01595	87.7193
S06	79	B	R	1	48.565	92.3077	90.9091	93.3333	30.303	26.6667	25	0	30	72.2222	7.77644	75.4386
S07	78	G	R	3	29.1244	57.6923	81.8182	40	15.1515	33.3333	0	0	5	86.1111	5.22228	70.1754
S08	74	G	R	3	20.3817	61.5385	36.3636	20	15.1515	20	0	0	10	69.4444	6.22878	84.2105
S09	78	G	R	3	28.5708	65.3846	63.6364	46.6667	21.2121	26.6667	0	0	5	75	7.49617	71.0526
S10	75	B	R	0	34.0589	73.0769	54.5455	60	18.1818	40	16.6667	0	10	75	6.41194	82.4561
S11	76	B	R	3	21.3636	50	45.4545	26.6667	12.1212	26.6667	0	0	10	69.4444	6.43167	63.1579
S12	81	G	R	1	60.6935	96.1538	100	86.6667	39.3939	46.6667	58.3333	33.3333	25	91.6667	5.276	94.7368
S13	75	B	R	1	42.8234	80.7692	90.9091	80	24.2424	40	16.6667	0	10	75	6.656	80.7018
S14	86	B	R	0	34.9417	69.2308	81.8182	66.6667	15.1515	20	16.6667	0	10	63.8889	9.02885	71.0526
S15	72	G	R	3	11.3782	57.6923	27.2727	0	6.06061	0	0	0	0	58.3333	4.91761	71.9298
S17	82	B	R	3	7.93998	42.3077	18.1818	0	3.0303	0	0	0	0	86.1111	9.90568	59.6491
S18	78	B	R	3	8.97436	38.4615	27.2727	0	6.06061	0	0	0	0	61.1111	9.55025	58.7719
S19	71	B	R	1	42.4403	88.4615	81.8182	73.3333	24.2424	26.6667	25	0	20	83.3333	7.77063	84.2105
S20	76	B	R	1	45.2812	88.4615	90.9091	60	21.2121	53.3333	25	8.33333	15	86.1111	4.3625	84.2105
S21	74	G	R	3	23.4237	57.6923	54.5455	33.3333	15.1515	26.6667	0	0	0	55.5556	13.71	67.5439
S22	72	B	R	3	4.60373	30.7692	0	0	6.06061	0	0	0	0	55.5556	12.0595	66.6667
S23	71	G	R	3	28.7558	73.0769	81.8182	20	15.1515	26.6667	8.33333	0	5	91.6667	5.8485	66.6667
S24	72	G	R	3	7.63403	30.7692	27.2727	0	3.0303	0	0	0	0	55.5556	8.44791	71.0526
S25	81	G	R	1	52.3237	76.9231	72.7273	80	27.2727	53.3333	58.3333	25	25	80.5556	2.74989	78.9474
S26	76	B	R	3	32.7899	73.0769	72.7273	46.6667	18.1818	33.3333	8.33333	0	10	63.8889	6.51192	70.1754
S27	72	G	R	3	16.2791	65.3846	45.4545	0	6.06061	13.3333	0	0	0	75	6.20876	80.7018
S28	79	G	R	1	45.8377	92.3077	81.8182	86.6667	24.2424	33.3333	16.6667	16.6667	15	94.4444	2.34573	84.2105
S29	75	G	R	3	28.3392	73.0769	54.5455	60	9.09091	6.66667	0	8.33333	15	69.4444	7.03933	85.9649
S30	82	B	L	1	47.3733	73.0769	100	86.6667	24.2424	33.3333	33.3333	8.33333	20	88.8889	8.78	80.7018
S31	75	B	R	3	16.097	69.2308	45.4545	0	9.09091	0	0	0	5	75	8.172	75.4386
S32	80	B	R	1	68.3945	92.3077	100	100	51.5152	46.6667	66.6667	25	65	97.2222	5.27317	94.7368
S33	82	B	R	0	34.5396	76.9231	81.8182	53.3333	24.2424	26.6667	8.33333	0	5	80.5556	6.43667	84.2105
S34	73	B	R	1	74.8718	92.3077	100	100	66.6667	53.3333	83.3333	33.3333	70	72.2222	11.7393	80.7018
S35	79	G	R	3	25.7416	61.5385	54.5455	46.6667	18.1818	20	0	0	5	83.3333	5.353	87.7193
S36	95	B	R	3	2.40385	19.2308	0	0	0	0	0	0	0	61.1111	9.26598	56.1404
S38	83	G	R	0	34.324	73.0769	63.6364	20	21.2121	40	25	16.6667	15	66.6667	5.31258	73.6842
S39	80	B	R	1	56.0577	88.4615	90.9091	93.3333	42.4242	40	41.6667	16.6667	35	94.4444	6.17721	89.4737
S40	76	G	R	3	4.22494	30.7692	0	0	3.0303	0	0	0	0	66.6667	5.1675	75.4386
S41	80	B	R	1	41.6871	80.7692	81.8182	86.6667	24.2424	20	16.6667	8.33333	15	88.8889	5.63213	80.7018
S42	81	G	R	0	35.0962	80.7692	81.8182	26.6667	18.1818	46.6667	8.33333	8.33333	10	97.2222	5.80701	70.1754
S43	84	B	L	1	41.7847	92.3077	81.8182	66.6667	15.1515	46.6667	16.6667	0	15	77.7778	3.887	85.9649
S44	75	G	R	3	30.9222	76.9231	63.6364	53.3333	15.1515	20	8.33333	0	10	61.1111	6.5455	71.9298
